# Supplementary material
Source: Research Square preprint supplement (doi:10.21203/rs.3.rs-8897257/v1)

# JOINPOINT ANALYSIS:

Supplementary Figure 1 : Overall mortality trends in Ischemic heart diseases and new infectious triggers (Influenza & Pneumonia). from 1999 to 2020


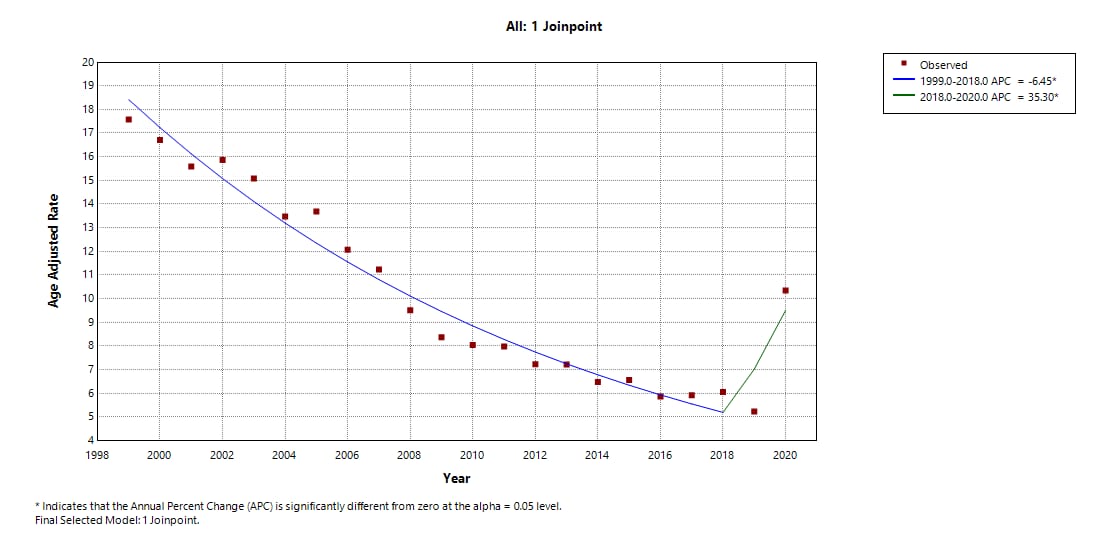


Supplementary Figure 2: Overall mortality trends by sex in Ischemic heart diseases and new infectious triggers (Influenza & Pneumonia) 1999 to 2020.


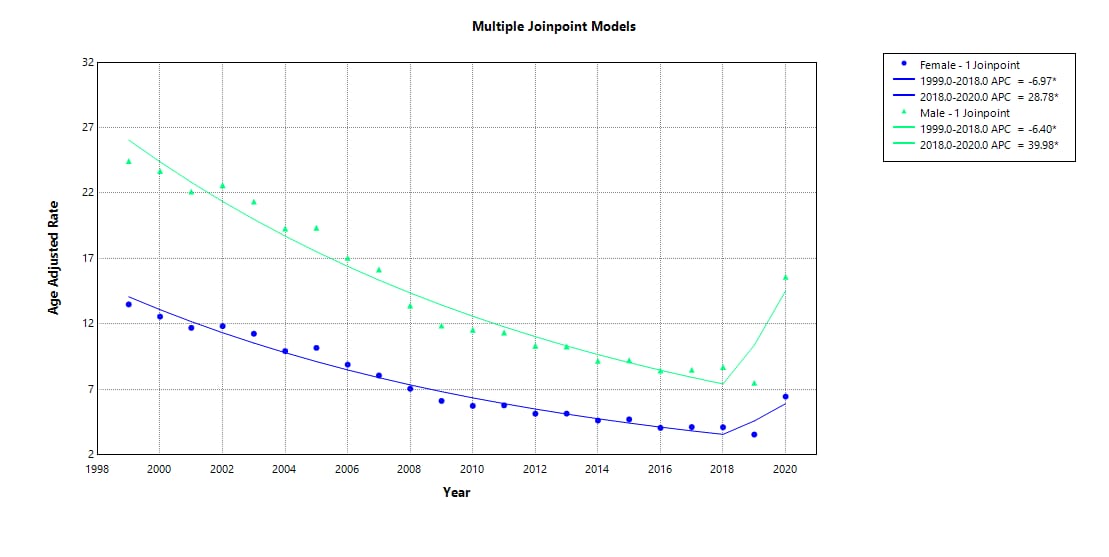


Supplementary Figure 3: Overall mortality trends by race in Ischemic heart diseases and new infectious triggers (Influenza & Pneumonia) 1999-2020


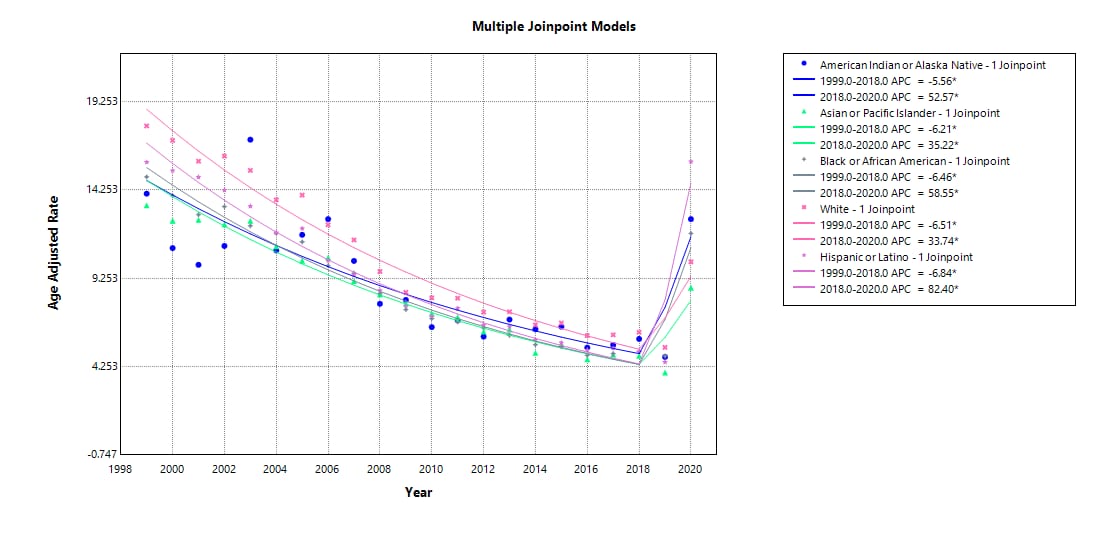


Supplementary Figure 4: Overall mortality trends in Ischemic heart diseases and new infectious triggers (Influenza & Pneumonia) by urbanization 1999-2020.


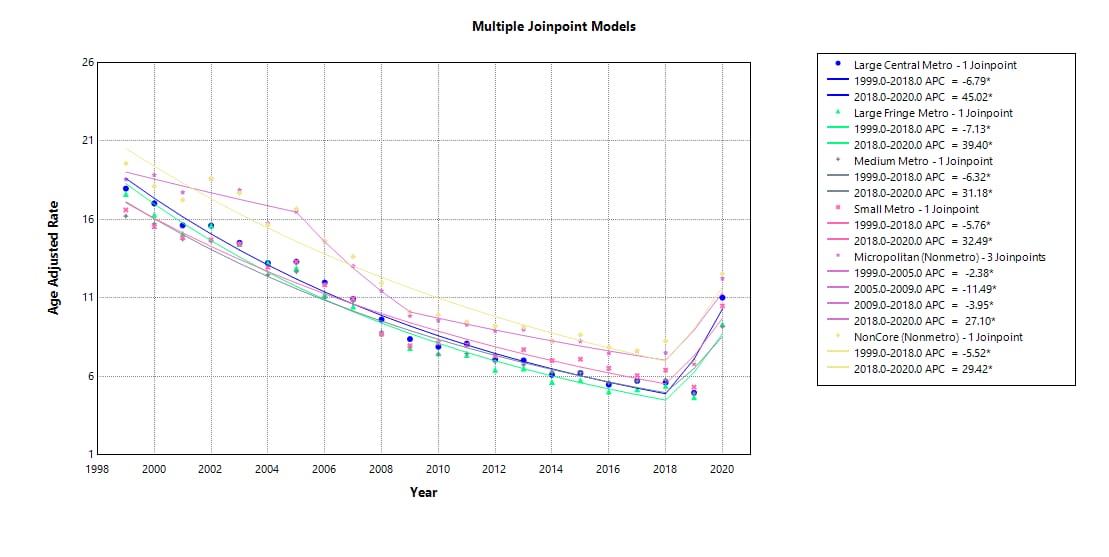


Supplementary Figure 5: Overall mortality trends in Ischemic heart diseases and new infectious triggers (Influenza & Pneumonia) by census region from 1999 to 2020


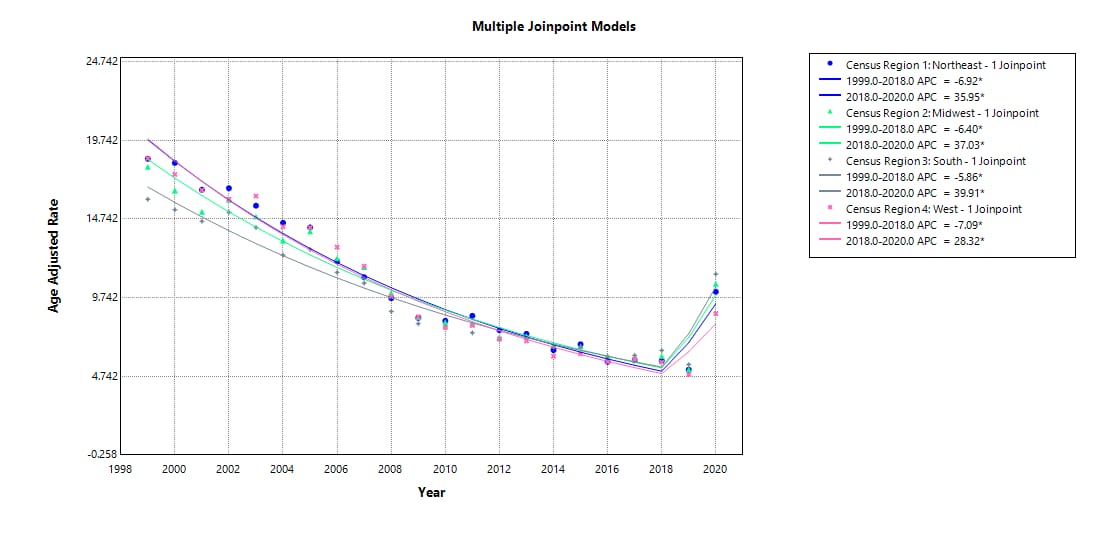

Supplement: Supplementary file 1 [file d2560326c4483893847f6a4f.docx]
